# Supplementary material
Source: publisher figshare collection journal article supplement (https://gsajournals.figshare.com/ndownloader/files/17412941)
Supplement: Supplementary file 1 [file 17412941]

## Sheet: tables10
Table S10 FST outliers from elevation, high and low latitude, and growth habit comparisons
SNPs_chr	SNPs_pos	SNP_ID	SNP_type	Comparisons	Gene_chr	Gene_start	Gene_end	Gene_id	Distance_from_SNP_to_gene_(bp)	Gene_function
chr6H	478197375	SCRI_RS_165986	noncoding	HE	chr6H	478129038	478134304	NA	-63071	U-box domain-containing protein 7
chr7H	531669971	SCRI_RS_206747	noncoding	HE	chr7H	531609712	531610109	NA	-59862	Cell division cycle and apoptosis regulator protein 1
chr4H	583815007	12_31231	noncoding	GH	chr4H	583794218	583798456	NA	-16551	pseudouridine synthase family protein
chr7H	16918186	12_31285	noncoding	LL	chr7H	16901917	16904981	NA	-13205	Cytochrome P450 superfamily protein
chr4H	201070769	12_20144	noncoding	HE,GH	chr4H	201065874	201066714	HORVU4Hr1G030810	-4055	3-ketoacyl-CoA synthase 20
chr7H	638446503	SCRI_RS_131173	noncoding	LL	chr7H	638440733	638442876	HORVU7Hr1G113890	-3627	unknown function
chr5H	587053505	12_20045	noncoding	LL	chr5H	587046084	587051335	HORVU5Hr1G091750	-2170	Methionine import ATP-binding protein MetN
chr3H	582491515	SCRI_RS_146347	noncoding	HE	chr3H	582486318	582489800	HORVU3Hr1G079210	-1715	calmodulin 5
chr4H	630864221	SCRI_RS_76975	noncoding	GH	chr4H	630862305	630862811	HORVU4Hr1G085060	-1410	undescribed protein
chr3H	208364495	SCRI_RS_173916	noncoding	HL	chr3H	208359817	208363758	HORVU3Hr1G036930	-737	Mediator of RNA polymerase II transcription subunit 27
chr2H	745234010	SCRI_RS_155544	noncoding	LL	chr2H	745229545	745233596	HORVU2Hr1G119480	-414	protein arginine methyltransferase 6
chr5H	54424436	SCRI_RS_201097	noncoding	HE	chr5H	54421543	54424134	HORVU5Hr1G014710	-302	WRKY DNA-binding protein 74
chr6H	538500956	SCRI_RS_102418	noncoding	GH	chr6H	538494533	538500824	HORVU6Hr1G079680	-132	E3 ubiquitin-protein ligase COP1
chr3H	183623287	12_31008	noncoding	HL	chr3H	183622749	183623205	HORVU3Hr1G034070	-82	Cell division control 48-E-like protein
chr4H	644851763	SCRI_RS_157277	noncoding	HL	chr4H	644848258	644851724	HORVU4Hr1G090320	-39	unknown function
chr3H	601474414	11_20628	noncoding	LL	chr3H	601470646	601474392	HORVU3Hr1G083090	-22	polypyrimidine tract-binding protein 3
chr3H	212834873	SCRI_RS_222735	noncoding	HL	chr3H	212826545	212834869	HORVU3Hr1G037470	-4	Lupus La protein homolog
chr7H	19591101	11_10025	syn.	GH	chr7H	19588563	19591968	HORVU7Hr1G013600	0	Transketolase
chr3H	28807967	11_10026	syn.	HL	chr3H	28804799	28808275	HORVU3Hr1G013350	0	triosephosphate isomerase
chr1H	456852946	11_10043	noncoding	HE	chr1H	456852498	456854789	HORVU1Hr1G063740	0	NAC domain protein,
chr6H	492317889	11_10124	noncoding	HE	chr6H	492317576	492319739	HORVU6Hr1G070670	0	60S ribosomal protein L31
chr2H	532288289	11_10191	noncoding	HL	chr2H	532288076	532292322	HORVU2Hr1G073760	0	Peroxiredoxin-2
chr4H	585200008	11_10247	nonsyn.	GH	chr4H	585199482	585200969	HORVU4Hr1G072480	0	Blue copper protein
chr4H	581788124	11_10309	noncoding	GH	chr4H	581786655	581788589	HORVU4Hr1G071730	0	Inositol-3-phosphate synthase
chr2H	723653192	11_10383	syn.	HL	chr2H	723652543	723658856	HORVU2Hr1G111640	0	Plasma membrane ATPase
chr4H	292267514	11_10424	syn.	GH	chr4H	292262638	292267898	HORVU4Hr1G038570	0	0S ribosomal protein S5
chr1H	496933333	11_10471	noncoding	HL	chr1H	496930968	496933348	HORVU1Hr1G072270	0	60S ribosomal protein L36-2
chr5H	609154093	11_10658	nonsyn.	HL	chr5H	609150170	609154223	HORVU5Hr1G098960	0	tubulin alpha-4 chain
chr1H	476365129	11_10686	noncoding	HL	chr1H	476364162	476366114	HORVU1Hr1G067110	0	Ethylene-responsive transcription factor 8
chr4H	633602081	11_10697	noncoding	HL	chr4H	633598411	633602233	HORVU4Hr1G086300	0	Beta-fructofuranosidase, insoluble isoenzyme 1
chr3H	590807078	11_10747	noncoding	LL	chr3H	590806901	590818660	HORVU3Hr1G080820	0	N-terminal kinase-like protein
chr3H	633085996	11_10821	noncoding	GH	chr3H	633085517	633090121	HORVU3Hr1G090760	0	Alpha/beta hydrolase domain-containing protein 11
chr4H	563098102	11_10846	syn.	HE	chr4H	563097660	563101200	HORVU4Hr1G067840	0	GDP-mannose transporter GONST3
chr7H	167862263	11_10983	syn.	GH	chr7H	167859242	167862615	HORVU7Hr1G048810	0	Transmembrane 9 superfamily member 12
chr6H	24667425	11_10994	syn.	GH	chr6H	24667323	24684418	HORVU6Hr1G012570	0	Peptidyl-prolyl cis-trans isomerase
chr4H	584339233	11_11004	noncoding	GH	chr4H	584339092	584341045	HORVU4Hr1G072310	0	FAD/NAD(P)-binding oxidoreductase family protein
chr3H	590764804	11_11021	syn.	HL	chr3H	590763878	590766899	HORVU3Hr1G080790	0	ubiquitin-conjugating enzyme 11
chr7H	7465605	11_11222	syn.	GH	chr7H	7460819	7467109	HORVU7Hr1G005270	0	cellulose synthase-like D3
chr4H	560337783	11_11224	nonsyn.	HE	chr4H	560337308	560341588	HORVU4Hr1G067520	0	Alpha-glucosidase 2
chr3H	653294646	11_11328	noncoding	HE	chr3H	653292226	653295393	HORVU3Hr1G096460	0	Transcription factor ICE1
chr5H	559673257	11_11361	nonsyn.	LL	chr5H	559672545	559673760	HORVU5Hr1G080300	0	Dehydration-responsive element-binding protein 1B
chr4H	19753671	11_20109	syn.	GH	chr4H	19752745	19754400	HORVU4Hr1G007530	0	microsomal glutathione s-transferase, putative
chr4H	620872317	11_20119	noncoding	HE	chr4H	620872075	620875644	HORVU4Hr1G082040	0	catalase 2
chr4H	15304563	11_20210	syn.	HL	chr4H	15304129	15308120	HORVU4Hr1G006530	0	beta glucosidase 43
chr1H	470389532	11_20290	syn.	HL	chr1H	470387218	470389957	HORVU1Hr1G066090	0	GDSL esterase/lipase
chr4H	492257862	11_20450	noncoding	HE	chr4H	492194227	492258095	HORVU4Hr1G058970	0	ATP synthase subunit b'
chr4H	494212244	11_20472	syn.	HE	chr4H	494209101	494213007	HORVU4Hr1G059120	0	UDP-glucose 4-epimerase
chr4H	597095822	11_20513	nonsyn.	HE	chr4H	597091145	597096520	HORVU4Hr1G075200	0	Sucrose transport protein
chr2H	513918258	11_20532	noncoding	LL	chr2H	513917439	513919304	HORVU2Hr1G046680	0	tRNA wybutosine-synthesizing protein 2/3/4
chr5H	635426502	11_20560	noncoding	LL	chr5H	635426240	635428560	HORVU5Hr1G111130	0	Remorin family protein
chr5H	617780015	11_20568	nonsyn.	LL	chr5H	617771607	617780560	HORVU5Hr1G103890	0	aldehyde oxidase 1
chr7H	95639213	11_20671	noncoding	HE	chr7H	95635701	95639466	HORVU7Hr1G038270	0	Aquaporin-like superfamily protein
chr3H	62322435	11_20719	syn.	HE	chr3H	62321646	62325343	HORVU3Hr1G020230	0	HXXXD-type acyl-transferase family protein
chr7H	525908171	11_20771	syn.	HE	chr7H	525905571	525908430	HORVU7Hr1G087340	0	unknown function
chr1H	522487000	11_20780	noncoding	HL	chr1H	522486713	522492797	HORVU1Hr1G079200	0	Lys-63-specific deubiquitinase BRCC36
chr5H	635422616	11_20876	nonsyn.	LL	chr5H	635419340	635425217	HORVU5Hr1G111110	0	Mitochondrial Rho GTPase 1
chr6H	503880223	11_20892	nonsyn.	GH	chr6H	503878510	503880548	HORVU6Hr1G072510	0	unknown function
chr4H	490028803	11_21017	syn.	HE	chr4H	490028284	490030177	HORVU4Hr1G058600	0	Nitric oxide synthase-interacting protein
chr5H	504438116	11_21133	syn.	GH	chr5H	504433143	504438703	HORVU5Hr1G065960	0	unknown function
chr5H	437938877	11_21244	syn.	HE,GH	chr5H	437938458	437945041	HORVU5Hr1G055920	0	UDP-glucose 4-epimerase 4
chr5H	618532844	11_21297	noncoding	HE	chr5H	618525543	618533146	HORVU5Hr1G104160	0	Peptidase M50 family protein
chr4H	585756306	11_21332	syn.	GH	chr4H	585753013	585756569	HORVU4Hr1G072520	0	high-affinity nickel-transport family protein
chr1H	352305893	11_21357	syn.	GH	chr1H	352304715	352309092	HORVU1Hr1G047680	0	methionine aminopeptidase 1A
chr2H	534370798	11_21399	nonsyn.	HL	chr2H	534370152	534375471	HORVU2Hr1G073920	0	WD repeat-containing protein 44
chr5H	624444586	12_10016	noncoding	LL	chr5H	624444151	624447136	HORVU5Hr1G106580	0	40S ribosomal protein S15
chr1H	80265534	12_10235	noncoding	GH	chr1H	80265149	80271695	HORVU1Hr1G020390	0	cullin 1
chr5H	408380006	12_10306	nonsyn.	GH	chr5H	408374621	408380719	HORVU5Hr1G052230	0	SEC14 cytosolic factor
chr4H	33956892	12_10371	syn.	LL	chr4H	33953500	33957940	HORVU4Hr1G011160	0	Endoglucanase 10
chr3H	541490133	12_10452	syn.	LL	chr3H	541485971	541492933	HORVU3Hr1G071570	0	trehalose phosphate synthase
chr4H	119346869	12_10492	syn.	HE,GH	chr4H	119346575	119349567	HORVU4Hr1G022580	0	Methyltransferase-related protein
chr4H	41661715	12_10836	nonsyn.	HE	chr4H	41659505	41662219	HORVU4Hr1G012530	0	unknown function
chr5H	30204455	12_10864	noncoding	HE	chr5H	30204144	30208613	HORVU5Hr1G011460	0	ATP-dependent RNA helicase DeaD
chr2H	29991973	12_10880	noncoding	GH	chr2H	29989393	29992391	HORVU2Hr1G013870	0	fatty acid desaturase 8
chr1H	461593387	12_11062	noncoding	HE	chr1H	461593267	461598480	HORVU1Hr1G064490	0	RAB GDP dissociation inhibitor 2
chr4H	467767377	12_11063	noncoding	GH	chr4H	467766317	467767774	HORVU4Hr1G055720	0	Gamma-interferon-inducible lysosomal thiol reductase
chr4H	408288244	12_11190	noncoding	HE,GH	chr4H	408288095	408290586	HORVU4Hr1G050210	0	Vicilin-like antimicrobial peptides 2-3
chr5H	582297690	12_11298	noncoding	LL	chr5H	582294664	582301638	HORVU5Hr1G088700	0	Protein phosphatase 2C family protein
chr2H	550843423	12_11316	noncoding	LL	chr2H	550840438	550843984	HORVU2Hr1G076530	0	Ribosome maturation factor RimP
chr3H	585500434	12_11468	noncoding	LL	chr3H	585500162	585502531	HORVU3Hr1G079870	0	91A protein
chr7H	508668950	12_11529	noncoding	HE	chr7H	508668429	508670848	HORVU7Hr1G084420	0	RAS-related GTP-binding nuclear protein 2
chr3H	446060694	12_20108	syn.	HE	chr3H	446058347	446062780	HORVU3Hr1G059060	0	Isocitrate dehydrogenase [NADP]
chr4H	34777219	12_20240	syn.	LL	chr4H	34775502	34777669	HORVU4Hr1G011280	0	CBS domain-containing protein YhcV
chr4H	603603245	12_20648	syn.	HE	chr4H	603599888	603603383	HORVU4Hr1G077250	0	Eukaryotic translation initiation factor 3 subunit K
chr7H	37802983	12_20803	syn.	GH	chr7H	37802714	37806920	HORVU7Hr1G023980	0	IQ-domain 9
chr4H	603360721	12_20825	noncoding	HE	chr4H	603352523	603373225	HORVU4Hr1G077220	0	Phosphoinositide phosphatase family protein
chr4H	27328794	12_21003	noncoding	GH	chr4H	27328128	27331368	HORVU4Hr1G009570	0	unknown function
chr5H	648725641	12_21290	noncoding	LL	chr5H	648725476	648728034	HORVU5Hr1G116740	0	Protein phosphatase 2C family protein
chr4H	118867833	12_21442	nonsyn.	HE,GH	chr4H	118865019	118874871	HORVU4Hr1G022540	0	unknown function
chr2H	559106614	12_21476	syn.	LL	chr2H	559103981	559113481	HORVU2Hr1G077220	0	12-oxophytodienoate reductase 2
chr5H	433569163	12_30111	syn.	HE,GH	chr5H	433566993	433574404	HORVU5Hr1G055920	0	UDP-glucose 4-epimerase 4
chr2H	5332638	12_30132	noncoding	GH	chr2H	5332105	5333847	HORVU2Hr1G002500	0	HXXXD-type acyl-transferase family protein
chr4H	583582367	12_30136	syn.	GH	chr4H	583581788	583583993	HORVU4Hr1G072130	0	4-coumarate:CoA ligase 5
chr4H	620533072	12_30158	noncoding	HL	chr4H	620532424	620537092	HORVU4Hr1G081940	0	4-coumarate--CoA ligase-like 4
chr1H	522448103	12_30191	nonsyn.	HL	chr1H	522447714	522449964	HORVU1Hr1G079140	0	Pectin lyase-like superfamily protein
chr2H	614418306	12_30205	noncoding	LL	chr2H	614417957	614419162	HORVU2Hr1G085000	0	|B-box zinc finger family protein
chr2H	525482637	12_30265	noncoding	HL	chr2H	525481434	525483107	HORVU2Hr1G073030	0	Carbonic anhydrase
chr3H	571162239	12_30278	noncoding	HL	chr3H	571156079	571162837	HORVU3Hr1G077030	0	diacylglycerol kinase 5
chr7H	556168102	12_30301	nonsyn.	HE	chr7H	556167649	556169768	HORVU7Hr1G091150	0	alpha-amylase-like
chr4H	77405732	12_30488	noncoding	GH	chr4H	77405181	77409824	HORVU4Hr1G017450	0	Aldehyde dehydrogenase family 3 member H1
chr4H	126859667	12_30503	nonsyn.	HE,GH	chr4H	126856767	126860039	HORVU4Hr1G023430	0	Cytochrome P450 superfamily protein
chr7H	59140448	12_30752	noncoding	HE	chr7H	59140374	59141161	HORVU7Hr1G030210	0	Jacalin-like lectin domain containing protein
chr5H	559462764	12_30854	nonsyn.	LL	chr5H	559462515	559464023	HORVU5Hr1G080230	0	Dehydration-responsive element-binding protein 1B
chr5H	598560068	12_30867	nonsyn.	HE	chr5H	598558007	598563926	HORVU5Hr1G095530	0	phytochrome C
chr6H	512160455	12_30940	noncoding	GH	chr6H	512158866	512162569	HORVU6Hr1G074030	0	glutamine synthetase 1;4
chr6H	542063070	12_31235	noncoding	HL	chr6H	542062578	542068282	HORVU6Hr1G080550	0	THO complex, subunit 5
chr2H	709519518	12_31406	noncoding	LL	chr2H	709519199	709527105	HORVU2Hr1G106410	0	Glycogen synthase 1
chr2H	29125743	BK_12	noncoding	HL,LL	chr2H	29123784	29127889	HORVU2Hr1G013400	0	pseudo-response regulator 7
chr2H	29126530	BK_13	noncoding	HL	chr2H	29123784	29127889	HORVU2Hr1G013400	0	pseudo-response regulator 7
chr2H	29127021	BK_14	nonsyn.	HL,LL	chr2H	29123784	29127889	HORVU2Hr1G013400	0	pseudo-response regulator 7
chr2H	29127414	BK_15	nonsyn.	HL,LL	chr2H	29123784	29127889	HORVU2Hr1G013400	0	pseudo-response regulator 7
chr2H	750406362	SCRI_RS_116590	syn.	HE	chr2H	750404169	750410438	HORVU2Hr1G120970	0	UBX domain-containing protein
chr2H	513416187	SCRI_RS_116920	syn.	HL	chr2H	513414226	513418176	HORVU2Hr1G071850	0	Protein phosphatase 2C family protein
chr2H	31559459	SCRI_RS_120529	syn.	GH	chr2H	31554737	31560311	HORVU2Hr1G014440	0	ubiquitin-activating enzyme 1
chr5H	644373736	SCRI_RS_12491	syn.	LL	chr5H	644373415	644378405	HORVU5Hr1G114630	0	Pentatricopeptide repeat-containing protein
chr6H	505836096	SCRI_RS_126705	syn.	GH	chr6H	505829515	505837284	HORVU6Hr1G072870	0	RNA-binding protein 1
chr2H	519110344	SCRI_RS_127347	noncoding	HL	chr2H	519108148	519110415	HORVU2Hr1G072400	0	Cytochrome P450 superfamily protein
chr7H	645815611	SCRI_RS_132118	noncoding	HL	chr7H	645815407	645825563	HORVU7Hr1G117780	0	Pleckstrin homology (PH) domain-containing protein / lipid-binding START domain-containing protein
chr5H	644527056	SCRI_RS_132308	noncoding	LL	chr5H	644526382	644527202	HORVU5Hr1G114750	0	Dolichol-phosphate mannosyltransferase
chr6H	522767633	SCRI_RS_133	syn.	GH	chr6H	522766210	522767726	HORVU6Hr1G075950	0	Starch synthase 2, chloroplastic/amyloplastic
chr4H	594795745	SCRI_RS_13460	syn.	GH	chr4H	594783176	594797250	HORVU4Hr1G074530	0	amine oxidase 1
chr1H	352865132	SCRI_RS_134850	noncoding	GH	chr1H	352861576	352865608	HORVU1Hr1G047730	0	Sphingoid long-chain bases kinase 1
chr2H	515421502	SCRI_RS_134925	syn.	HL	chr2H	515420935	515427029	HORVU2Hr1G071960	0	Acetyl-coenzyme A synthetase
chr2H	173657292	SCRI_RS_136233	noncoding	HL	chr2H	173650533	173657568	HORVU2Hr1G037680	0	Pyridoxamine 5'-phosphate oxidase family protein
chr2H	541016992	SCRI_RS_140618	syn.	LL	chr2H	541015623	541019741	HORVU2Hr1G075030	0	Protein kinase superfamily protein
chr3H	212003870	SCRI_RS_141166	syn.	HL	chr3H	212002459	212007787	HORVU3Hr1G037310	0	Translin family protein
chr2H	132659867	SCRI_RS_142400	noncoding	HL	chr2H	132658959	132660537	HORVU2Hr1G033450	0	undescribed protein
chr5H	579650572	SCRI_RS_142618	noncoding	HL	chr5H	579648821	579658361	HORVU5Hr1G087810	0	UTP--glucose-1-phosphate uridylyltransferase
chr4H	645032232	SCRI_RS_142924	nonsyn.	HL	chr4H	645030104	645033471	HORVU4Hr1G090370	0	C2 domain-containing protein
chr5H	624175333	SCRI_RS_143179	noncoding	LL	chr5H	624171259	624175591	HORVU5Hr1G106470	0	Polycomb group RING finger protein 1
chr6H	411163274	SCRI_RS_143492	nonsyn.	LL	chr6H	411159828	411165746	HORVU6Hr1G061380	0	Abhydrolase domain-containing protein 1
chr3H	570865940	SCRI_RS_14456	noncoding	HL	chr3H	570857777	570866141	HORVU3Hr1G076910	0	Rp1-like protein
chr7H	16889273	SCRI_RS_144773	noncoding	LL	chr7H	16888900	16893731	HORVU7Hr1G012140	0	Cytochrome P450 superfamily protein
chr4H	620879737	SCRI_RS_14487	noncoding	HE	chr4H	620878244	620887671	HORVU4Hr1G082050	0	ubiquitin family protein
chr1H	514266568	SCRI_RS_145026	noncoding	GH	chr1H	514260346	514272318	HORVU1Hr1G076480	0	trehalose phosphate synthase
chr3H	583914027	SCRI_RS_146480	nonsyn.	HE	chr3H	583908635	583914558	HORVU3Hr1G079500	0	Chromosome 3B, genomic scaffold, cultivar Chinese Spring
chr5H	617777065	SCRI_RS_146573	nonsyn.	HL	chr5H	617771607	617780560	HORVU5Hr1G103890	0	aldehyde oxidase 1
chr6H	547242905	SCRI_RS_147062	syn.	LL	chr6H	547237852	547245179	HORVU6Hr1G082120	0	Zinc finger CCCH domain-containing protein 55
chr3H	624980267	SCRI_RS_148653	syn.	HL	chr3H	624974217	624982301	HORVU3Hr1G088450	0	Vacuolar protein sorting-associated protein 53 A
chr4H	640506418	SCRI_RS_148782	noncoding	GH	chr4H	640503828	640510906	HORVU4Hr1G088440	0	Methionyl-tRNA formyltransferase
chr2H	516578823	SCRI_RS_1502	nonsyn.	HL	chr2H	516578496	516583796	HORVU2Hr1G072140	0	Uridylate kinase
chr4H	463388522	SCRI_RS_150603	nonsyn.	GH	chr4H	463386311	463390493	HORVU4Hr1G055240	0	Malonyl CoA-acyl carrier protein transacylase
chr5H	651130719	SCRI_RS_150686	nonsyn.	LL	chr5H	651128666	651143199	HORVU5Hr1G117720	0	Sentrin-specific protease 7
chr6H	551474681	SCRI_RS_151574	syn.	GH	chr6H	551473995	551475227	HORVU6Hr1G083470	0	Cysteine-rich venom protein
chr3H	653548291	SCRI_RS_151733	nonsyn.	HE	chr3H	653547452	653550381	HORVU3Hr1G096550	0	glutamine cyclotransferase
chr7H	19924584	SCRI_RS_152228	noncoding	LL	chr7H	19924234	19929528	HORVU7Hr1G014150	0	RNA 2'-phosphotransferase, Tpt1 / KptA family
chr2H	687255317	SCRI_RS_153793	nonsyn.	LL	chr2H	687254186	687257102	HORVU2Hr1G099290	0	Polygalacturonase QRT3
chr6H	482170143	SCRI_RS_154805	syn.	HE	chr6H	482169905	482172190	HORVU6Hr1G069480	0	BTB/POZ domain-containing protein
chr5H	614779750	SCRI_RS_155999	noncoding	LL	chr5H	614776794	614872287	HORVU5Hr1G103040	0	FAD/NAD(P)-binding oxidoreductase family protein
chr4H	644508178	SCRI_RS_157125	syn.	GH	chr4H	644506182	644508490	HORVU4Hr1G090150	0	peptidyl-prolyl cis-trans isomerases
chr2H	726022609	SCRI_RS_159212	syn.	GH	chr2H	726021577	726034727	HORVU2Hr1G112620	0	Staphylococcal nuclease homologue|none
chr2H	252287919	SCRI_RS_160277	syn.	HE	chr2H	252266491	252287970	HORVU2Hr1G046680	0	tRNA wybutosine-synthesizing protein 2/3/4
chr4H	584895026	SCRI_RS_164399	syn.	GH	chr4H	584894047	584895393	HORVU4Hr1G072410	0	expansin 11
chr2H	542043487	SCRI_RS_165669	nonsyn.	LL	chr2H	542039230	542046047	HORVU2Hr1G075190	0	Protein kinase superfamily protein
chr5H	589927256	SCRI_RS_167563	nonsyn.	GH	chr5H	589926270	589927396	HORVU5Hr1G092970	0	Glutathione S-transferase 3
chr2H	527529164	SCRI_RS_167594	nonsyn.	HL	chr2H	527528854	527529521	HORVU2Hr1G073330	0	RNA-binding protein 1
chr4H	42228476	SCRI_RS_167844	nonsyn.	HE	chr4H	42224983	42228980	HORVU4Hr1G012630	0	4-coumarate:CoA ligase 2
chr2H	755770787	SCRI_RS_170209	syn.	LL	chr2H	755770377	755771998	HORVU2Hr1G123480	0	CCR4-NOT transcription complex subunit 8
chr2H	637003220	SCRI_RS_172667	noncoding	GH	chr2H	637002922	637003775	HORVU2Hr1G089140	0	response to karrikin
chr3H	375963564	SCRI_RS_173717	noncoding	LL	chr3H	375961302	375963723	HORVU3Hr1G051820	0	Protein kinase superfamily protein
chr5H	644010425	SCRI_RS_175338	syn.	LL	chr5H	644001748	644035358	HORVU5Hr1G114510	0	unknown protein
chr3H	32699173	SCRI_RS_180821	noncoding	HE	chr3H	32696868	32699191	HORVU3Hr1G014320	0	MATE efflux family protein
chr2H	31770963	SCRI_RS_182270	syn.	GH	chr2H	31770339	31772963	HORVU2Hr1G014550	0	undescribed protein
chr2H	239770197	SCRI_RS_182959	noncoding	HL	chr2H	239770151	239778234	HORVU2Hr1G045610	0	Patatin-like protein 1
chr2H	537392006	SCRI_RS_185710	noncoding	HL	chr2H	537380216	537401424	HORVU2Hr1G074430	0	Serine/threonine-protein kinase
chr7H	638684100	SCRI_RS_189592	noncoding	HE	chr7H	638680018	638690750	HORVU7Hr1G114030	0	Protein HASTY 1
chr4H	33504527	SCRI_RS_190764	syn.	LL	chr4H	33501235	33505105	HORVU4Hr1G011020	0	Alba DNA/RNA-binding protein
chr3H	625216867	SCRI_RS_196677	noncoding	HL	chr3H	625214813	625217351	HORVU3Hr1G088530	0	Nucleotide-diphospho-sugar transferase superfamily protein
chr3H	625592242	SCRI_RS_198594	noncoding	LL	chr3H	625591542	625592614	HORVU3Hr1G088690	0	oxidation reduction
chr7H	59710274	SCRI_RS_202653	noncoding	HE	chr7H	59708788	59710757	HORVU7Hr1G030280	0	unknown protein
chr3H	582494906	SCRI_RS_206471	noncoding	HE	chr3H	582494387	582498825	HORVU3Hr1G079260	0	Ribonuclease 3
chr5H	644033381	SCRI_RS_206883	nonsyn.	LL	chr5H	644001748	644035358	HORVU5Hr1G114510	0	unknown protein
chr3H	559146297	SCRI_RS_207408	nonsyn.	LL	chr3H	559145073	559148627	HORVU3Hr1G074680	0	Tunicamycin induced 1
chr2H	188389230	SCRI_RS_214410	nonsyn.	GH	chr2H	188388361	188389731	HORVU2Hr1G039510	0	Cytochrome c
chr5H	644377861	SCRI_RS_220002	noncoding	LL	chr5H	644373415	644378405	HORVU5Hr1G114630	0	Pentatricopeptide repeat-containing protein
chr2H	519108902	SCRI_RS_222769	syn.	HL	chr2H	519108148	519110415	HORVU2Hr1G072400	0	Cytochrome P450 superfamily protein
chr3H	209056543	SCRI_RS_223894	syn.	HL	chr3H	209056466	209057885	HORVU3Hr1G036970	0	undescribed protein
chr1H	533870854	SCRI_RS_224392	syn.	LL	chr1H	533870317	533872913	HORVU1Hr1G084390	0	GDSL esterase/lipase
chr2H	534372992	SCRI_RS_231725	nonsyn.	HL	chr2H	534370152	534375471	HORVU2Hr1G073920	0	WD repeat-containing protein 44
chr2H	525738592	SCRI_RS_235063	nonsyn.	HL	chr2H	525737738	525745689	HORVU2Hr1G073110	0	Protein transport protein SEC24
chr4H	621323439	SCRI_RS_235688	syn.	HE	chr4H	621320681	621325419	HORVU4Hr1G082110	0	Plant regulator RWP-RK family protein
chr4H	644513369	SCRI_RS_235762	syn.	GH	chr4H	644508964	644513417	HORVU4Hr1G090160	0	DNA repair endonuclease UVH1
chr5H	644029663	SCRI_RS_236958	syn.	LL	chr5H	644001748	644035358	HORVU5Hr1G114510	0	unknown protein
chr5H	644374957	SCRI_RS_354	nonsyn.	LL	chr5H	644373415	644378405	HORVU5Hr1G114630	0	Pentatricopeptide repeat-containing protein
chr4H	15282270	SCRI_RS_58772	noncoding	HL	chr4H	15282084	15288070	HORVU4Hr1G006510	0	Nucleotide-sugar transporter family protein
chr6H	542413945	SCRI_RS_8252	syn.	HL	chr6H	542411655	542417027	HORVU6Hr1G080620	0	Remorin family protein
chr4H	636574078	SCRI_RS_9164	syn.	GH	chr4H	636572240	636574136	HORVU4Hr1G087340	0	60 kDa jasmonate-induced protein
chr4H	36195212	SCRI_RS_9296	nonsyn.	LL	chr4H	36194587	36197584	HORVU4Hr1G011590	0	WRKY DNA-binding protein 74
chr6H	551259569	SCRI_RS_98225	noncoding	GH	chr6H	551255871	551261587	HORVU6Hr1G083430	0	RING/U-box superfamily protein
chr2H	29124351	BK_16	nonsyn.	HL	chr2H	29123785	29127889	HORVU2Hr1G013400	0	pseudo-response regulator 7
chr3H	624984222	SCRI_RS_236528	noncoding	HL	chr3H	624984222	624988609	HORVU3Hr1G088460	1	UDP-N-acetylglucosamine--peptide N-acetylglucosaminyltransferase
chr2H	219489782	12_30828	noncoding	HE	chr2H	219489839	219491715	HORVU2Hr1G043220	58	60S ribosomal protein L38
chr2H	539267692	SCRI_RS_125516	noncoding	HL	chr2H	539267888	539271030	HORVU2Hr1G074740	197	COP9 signalosome complex subunit 8
chr2H	684694543	SCRI_RS_209622	noncoding	HL	chr2H	684695052	684699157	HORVU2Hr1G098800	510	lecithin:cholesterol acyltransferase 3
chr2H	133834112	SCRI_RS_206492	noncoding	HL	chr2H	133834820	133836361	HORVU2Hr1G033660	709	peptide transporter 1
chr4H	366230669	12_20831	noncoding	GH	chr4H	366232233	366233553	HORVU4Hr1G045980	1565	Beta-adaptin-like protein C
chr4H	47783029	SCRI_RS_130433	noncoding	GH	chr4H	47788039	47793161	NA	5011	Aldo-keto reductase
chr6H	573389448	11_11187	noncoding	HL	chr6H	573394786	573397093	NA	5339	Tubulin-specific chaperone A
chr7H	61612172	SCRI_RS_171008	noncoding	GH	chr7H	61622928	61624887	NA	10757	HXXXD-type acyl-transferase family protein
chr2H	516165761	11_10685	noncoding	HL	chr2H	516178345	516179005	NA	12585	UPF0496 protein
chr7H	59282286	SCRI_RS_172335	noncoding	HE	chr7H	59295919	59405650	NA	13634	Protein RTF2 homolog
chr5H	65786219	SCRI_RS_212505	noncoding	HE	chr5H	65801719	65802421	NA	15501	unknown function
chr5H	615077620	SCRI_RS_201831	noncoding	LL	chr5H	615113397	615116552	NA	35778	GDSL esterase/lipase
chr2H	535588694	11_20438	noncoding	HL	chr2H	536033079	536034909	NA	444386	RING/U-box superfamily protein
